# Supplementary material for: Precise and efficient nucleotide substitution near genomic nick via noncanonical homology-directed repair
Source: HighWire-hosted journal article supplement (doi:10.1101/gr.226027.117), 2017-12-22
Supplement: Supplemental_Fig_S1.pdf [file Supplemental_Fig_S1.pdf]

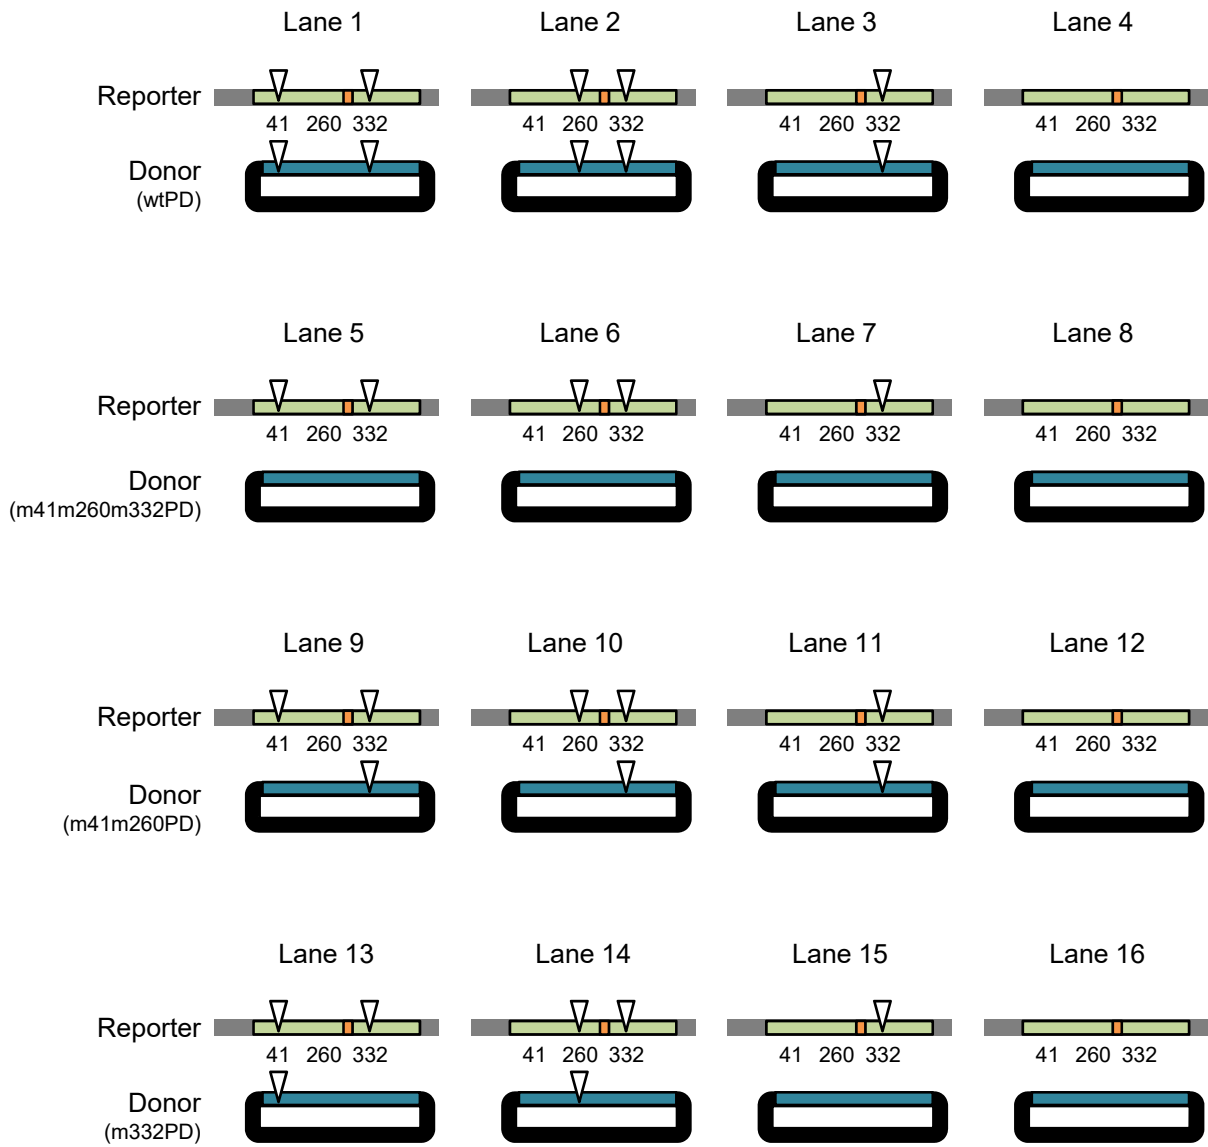

Supplemental Figure S1. Schematic of the experiment in Fig. 1D. Nick sites are indicated by inverted triangles. The target nucleotide is indicated by an orange rectangle.
