# Supplementary material for: Precise and efficient nucleotide substitution near genomic nick via noncanonical homology-directed repair
Source: HighWire-hosted journal article supplement (doi:10.1101/gr.226027.117), 2017-12-22
Supplement: Supplemental_Fig_S2.pdf [file Supplemental_Fig_S2.pdf]

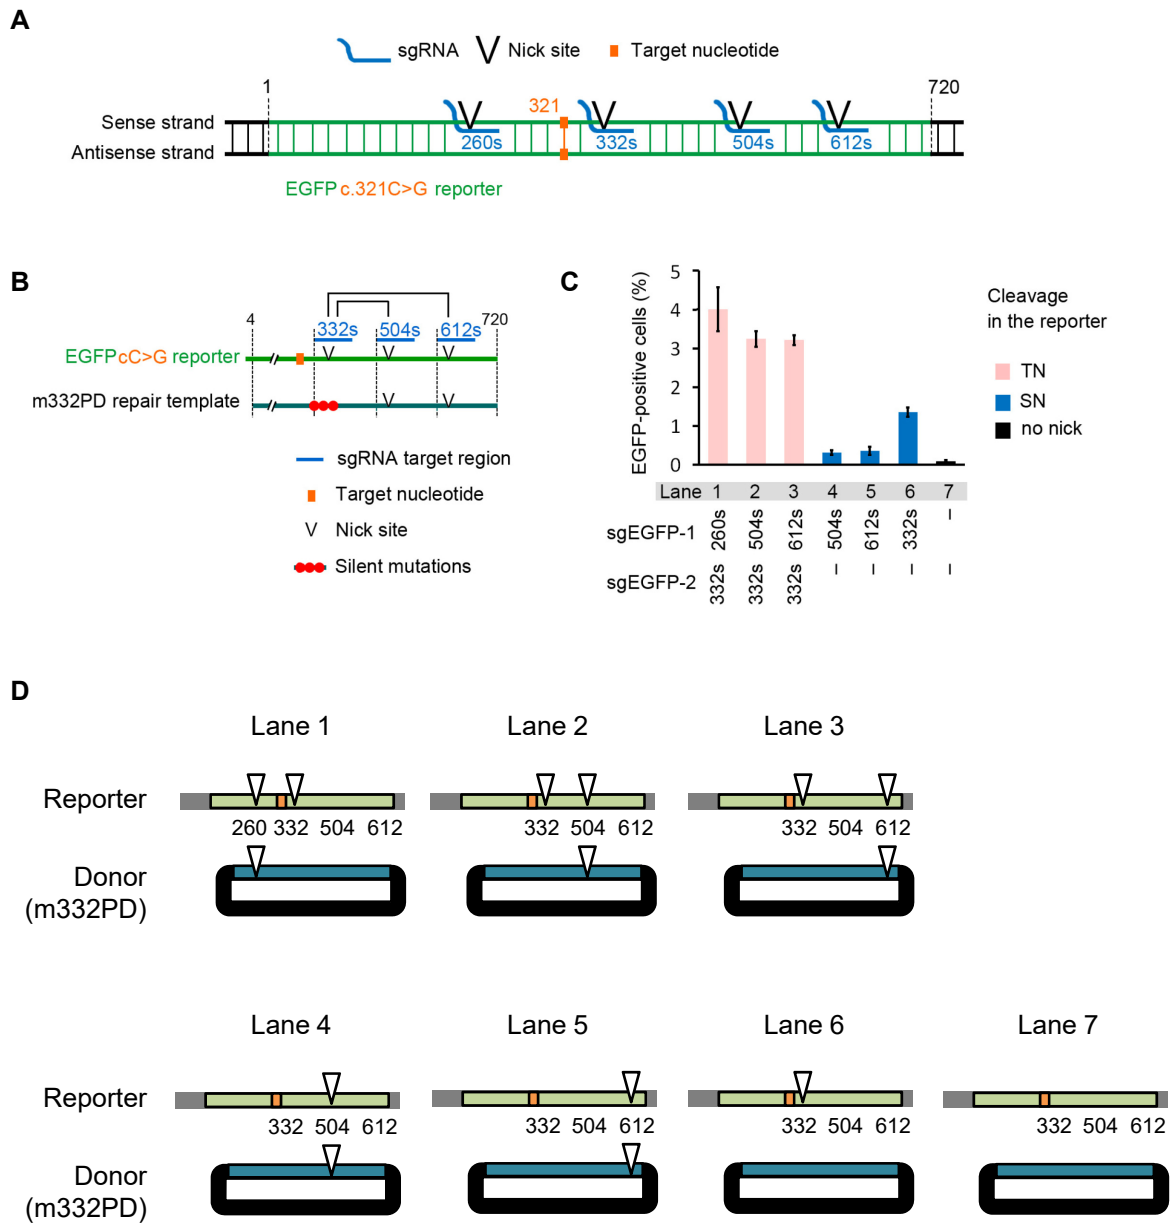

Supplemental Figure S2. Nucleotide substitution by tandem nick (TN) of the reporter gene. (A) Diagram of the EGFPcC>G reporter gene and sgRNAs. (B) Diagram of the repair templates. (C) The nucleotide substitution efficiency as measured by flow cytometry (mean  $\pm$  s.d., N=3) is presented. The indicated sgRNAs were expressed with Cas9D10A. m332PD was introduced into the cells as plasmid donors. (D) Schematic of the experiment in C. Nick sites are indicated by inverted triangles. The target nucleotide is indicated by an orange rectangle.
