# Supplementary material for: Precise and efficient nucleotide substitution near genomic nick via noncanonical homology-directed repair
Source: HighWire-hosted journal article supplement (doi:10.1101/gr.226027.117), 2017-12-22
Supplement: Supplemental_Fig_S3.pdf [file Supplemental_Fig_S3.pdf]

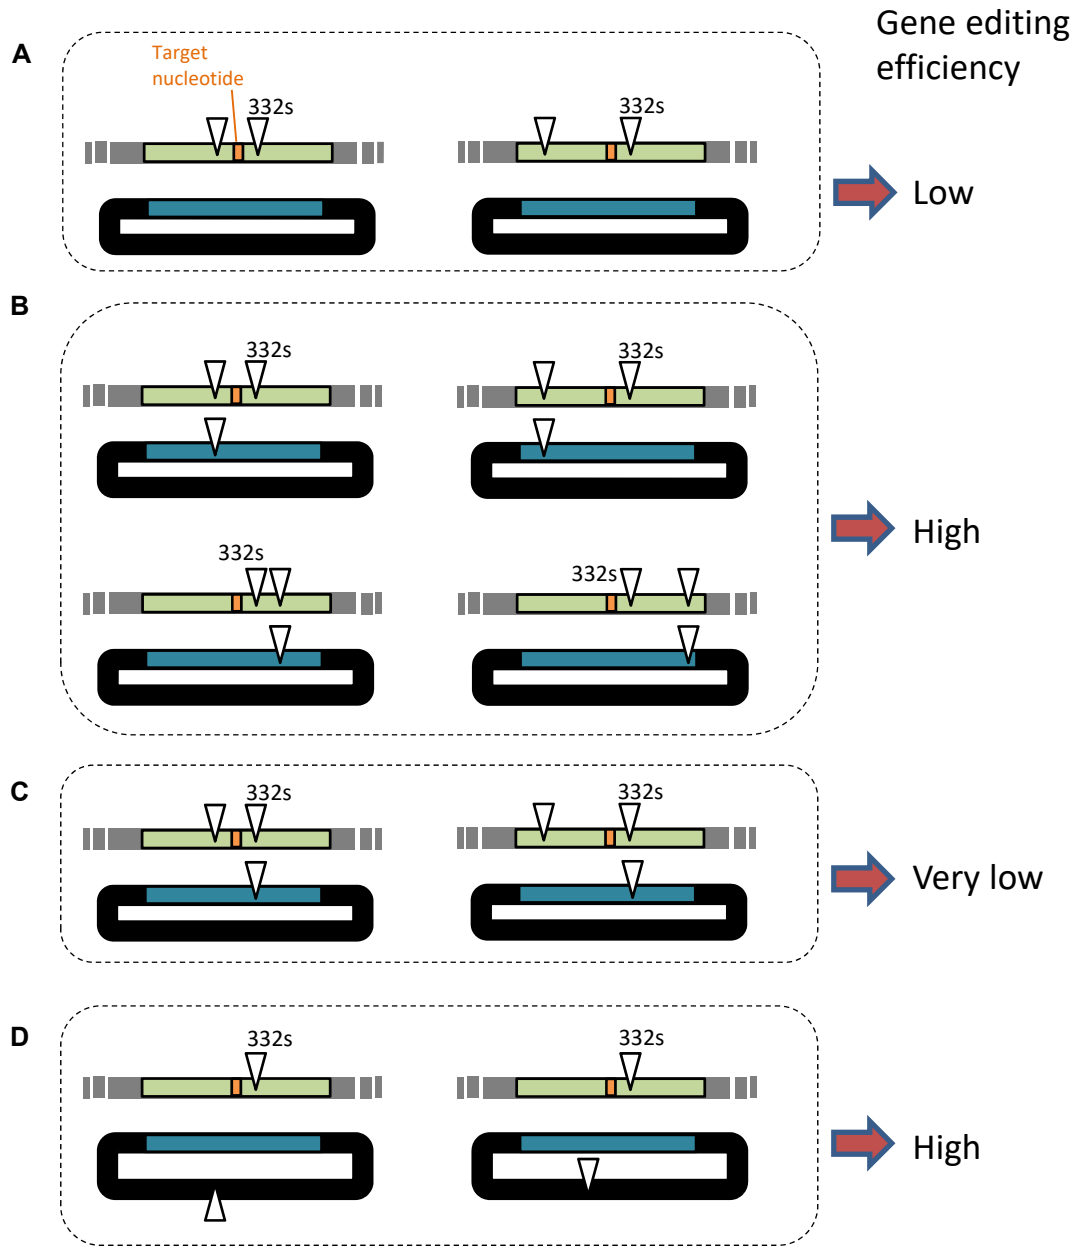

Supplemental Figure S3. Schematic of TN or SNGD-induced gene editing. (A) A TN (combination of nicks at the sgEGFP332s site and one more site) in the target gene and no nick in the repair template of the donor plasmid. (B) A TN in the target gene and an SN at a site other than the sgEGFP332s site in the repair template of the donor plasmid. (C) A TN in the target gene and an SN at the sgEGFP332s site in the repair template of the donor plasmid. (D) An SN in the target gene at the sgEGFP332s site and an SN anywhere in the backbone of the donor plasmid. Nick sites are indicated by inverted triangles. The target nucleotide is indicated by an orange rectangle.
