# Supplementary material for: Precise and efficient nucleotide substitution near genomic nick via noncanonical homology-directed repair
Source: HighWire-hosted journal article supplement (doi:10.1101/gr.226027.117), 2017-12-22
Supplement: Supplemental_Fig_S4.pdf [file Supplemental_Fig_S4.pdf]

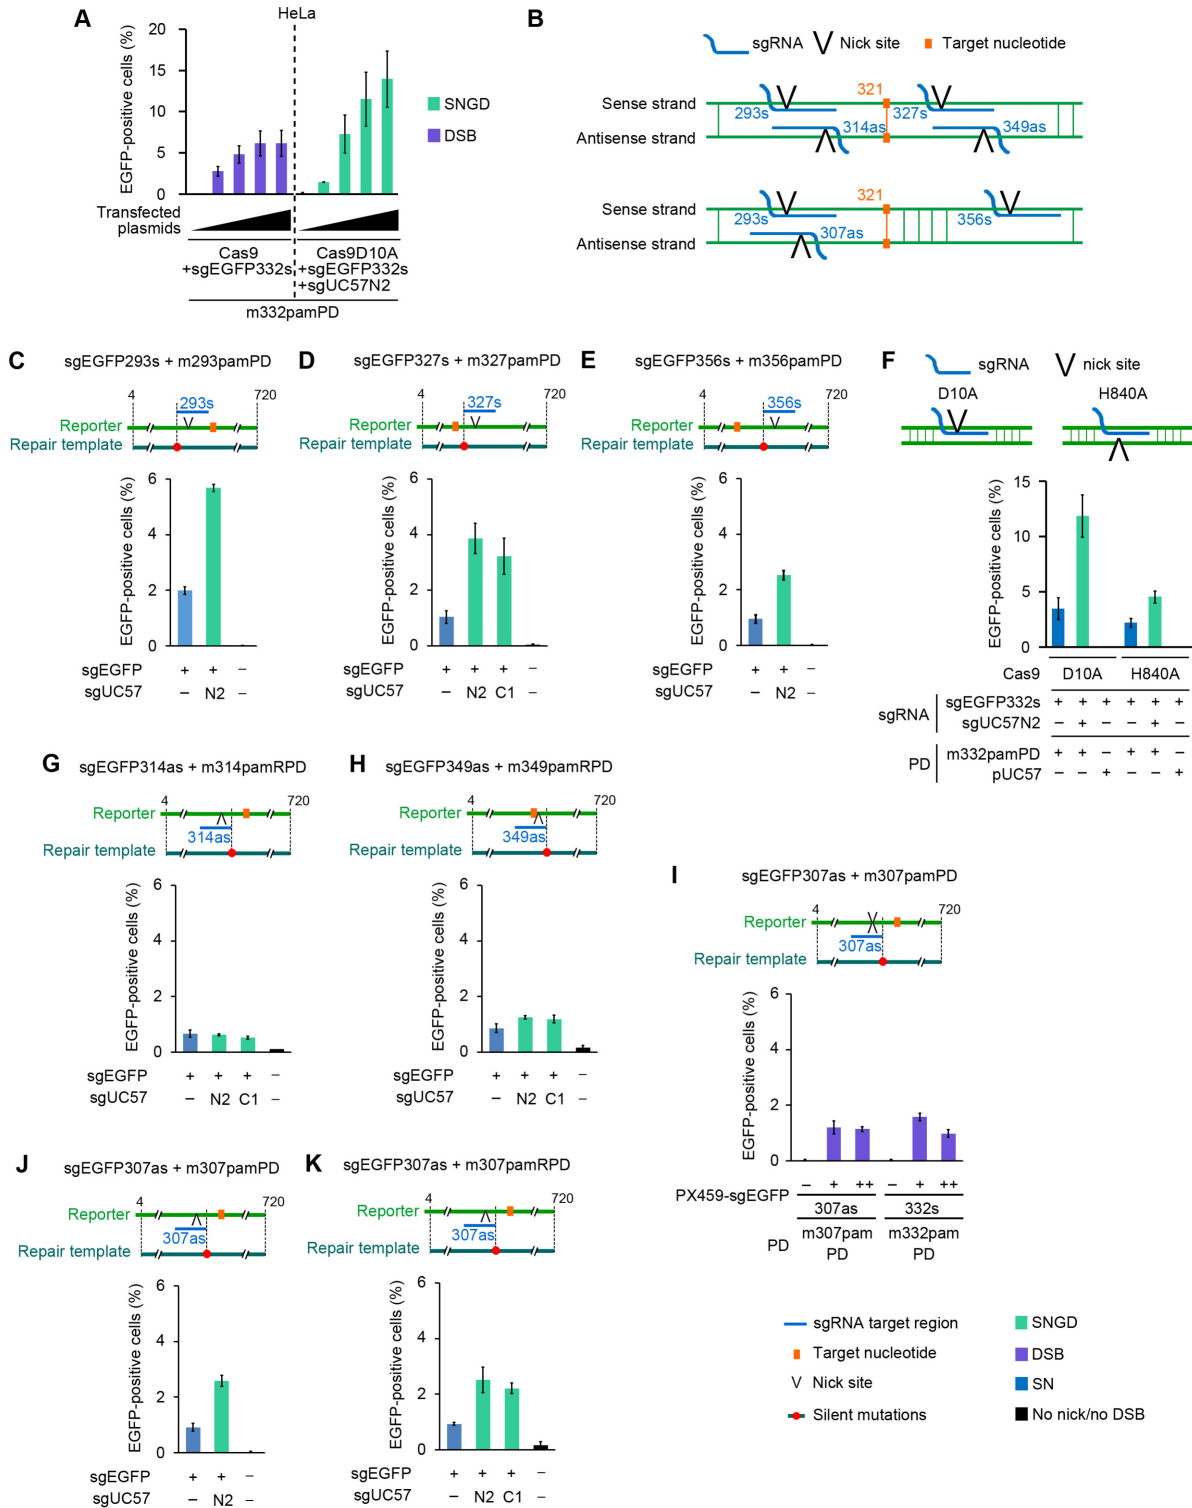

Supplemental Figure S4. Nucleotide substitution by SNGD. (A) DSB-mediated and SNGD-mediated nucleotide substitution using m332pamPD. Combinations with PX459-sgEGFP332s and PX459-empty or PX462-sgEGFP332s and PX462-sgUC57N2 (0, 0.05, 0.1, 0.15, or 0.2  $\mu$ g each), and m332pamPD (0, 0.5, 1.0, 1.5, or 2.0  $\mu$ g) in 10  $\mu$ L of R buffer were subjected to electroporation. Nucleotide substitution efficiency as measured by flow cytometry (mean  $\pm$  s.d., N=3) is presented. (B) Diagram of the EGFPc>G reporter gene and sgRNAs. (C-K) Nucleotide substitution efficiency as measured by flow cytometry (mean  $\pm$  s.d., N=3) is presented in each panel. (C-E, G, H, J, K) SNGD-mediated nucleotide substitution using Cas9D10A. (F) SNGD-mediated nucleotide substitution using Cas9H840A. (I) DSB-mediated nucleotide substitution using Cas9. +: 0.04  $\mu$ g, ++: 0.08  $\mu$ g)
