# Supplementary material for: Precise and efficient nucleotide substitution near genomic nick via noncanonical homology-directed repair
Source: HighWire-hosted journal article supplement (doi:10.1101/gr.226027.117), 2017-12-22
Supplement: Supplemental_Fig_S5.pdf [file Supplemental_Fig_S5.pdf]

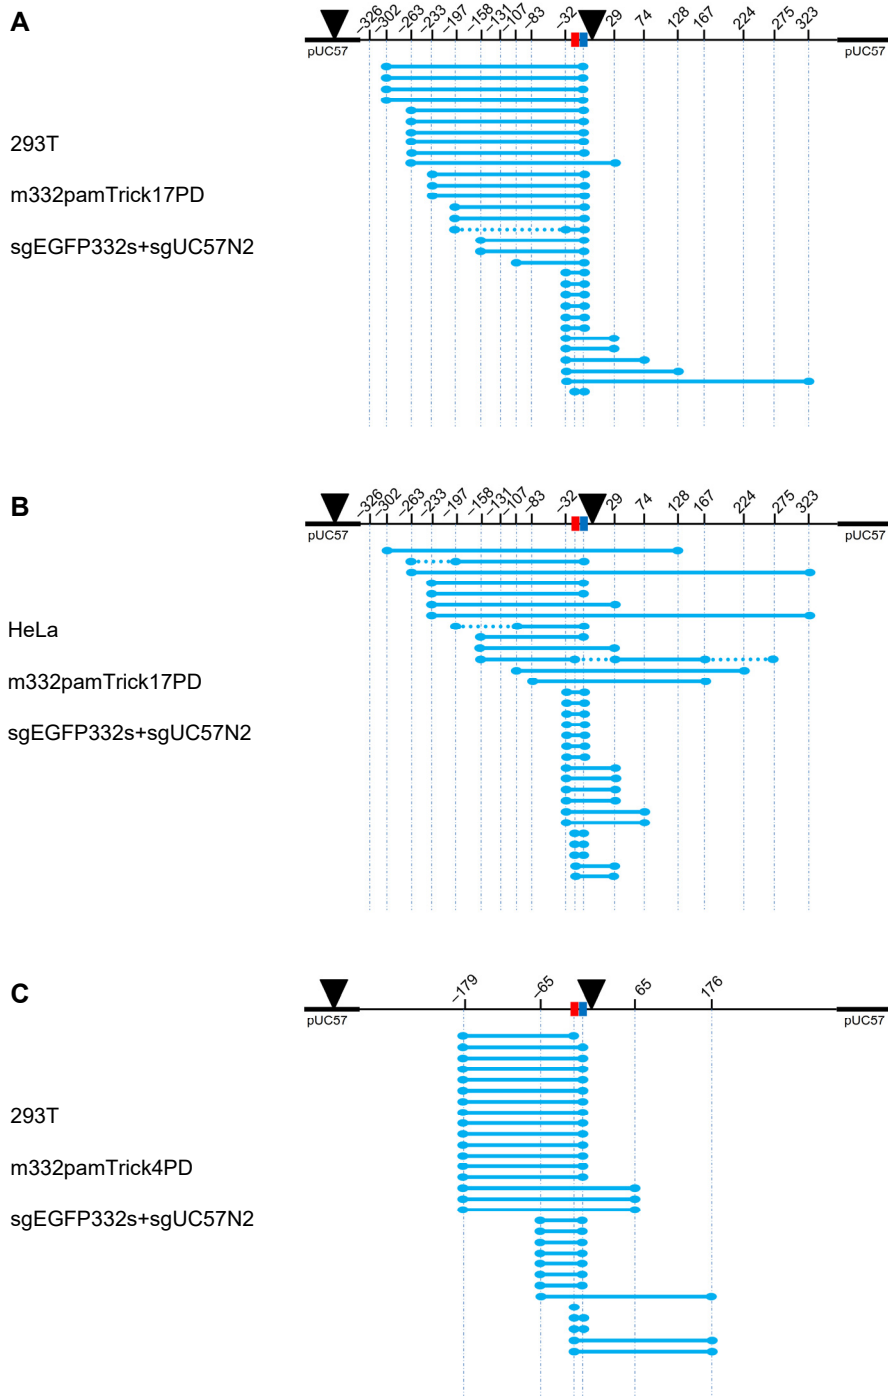

Supplemental Figure S5. Sequence analysis of the EGFPc>G reporter. 293T EGFPc>G reporter cells (A, C) or HeLa EGFPc>G reporter cells (B) were subjected to DNA sequence analysis after SNGD-mediated gene editing using m332pamTrick17PD (A, B) or m332pamTrick4PD (C). An SN in the EGFPc>G reporter was introduced at the sgEGFP332s site, and an SN in the donor plasmid was introduced at the sgUC57N2 site. Regions incorporated into the reporter gene are indicated by dots with solid lines. Dashed lines indicate a non-incorporated region between two incorporated regions. Nick sites, the targeted nucleotide (c.321G), and a silent mutation on the sgEGFP332s region are indicated by triangles, a red filled rectangle, and a blue filled rectangle, respectively. The locations of silent mutations in the repair template are indicated with numbers. Each number represents the distance in base pairs from the nick site at the sgEGFP332s target locus. A minus sign denotes that the mutant nucleotide is in the 5' direction in relation to the nick site.
