# Supplementary material for: Precise and efficient nucleotide substitution near genomic nick via noncanonical homology-directed repair
Source: HighWire-hosted journal article supplement (doi:10.1101/gr.226027.117), 2017-12-22
Supplement: Supplemental_Fig_S6.pdf [file Supplemental_Fig_S6.pdf]

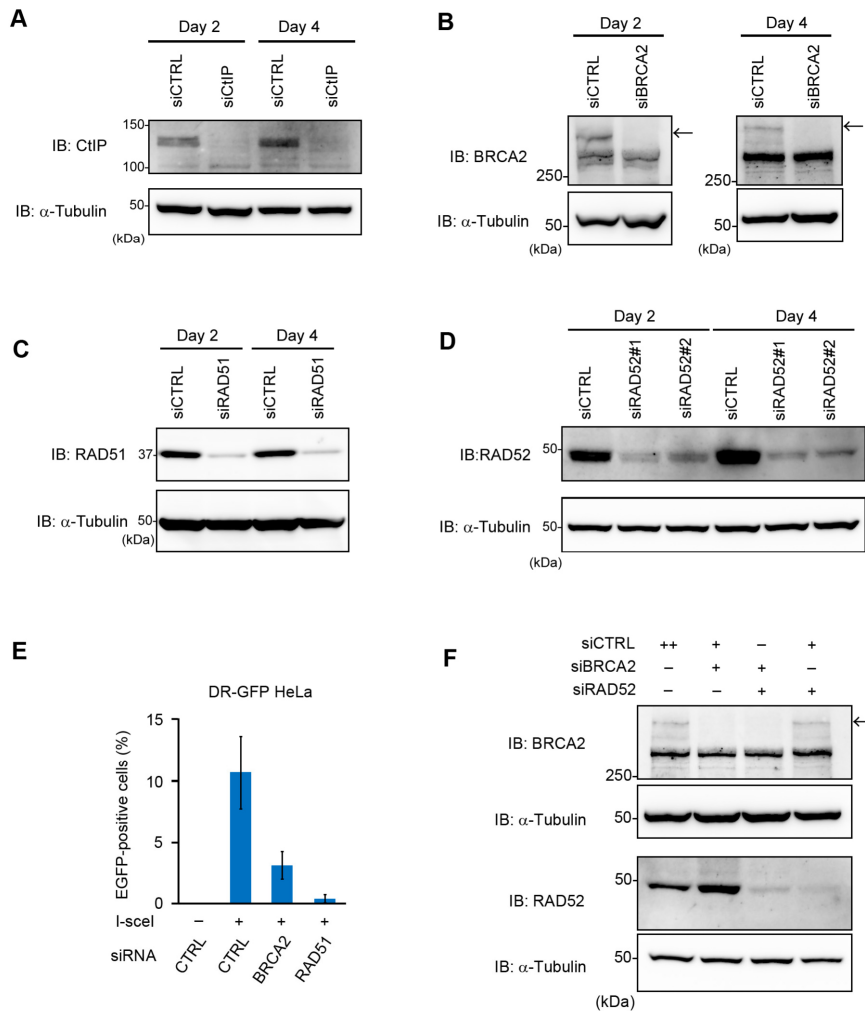

Supplemental Figure S6. siRNA-mediated gene knockdown. (A-D) The indicated siRNAs were used to transfect HeLa EGFPc>G reporter cells. Two or four days after transfection, the total cell lysate was subjected to immunoblotting. The arrows indicate BRCA2-specific bands. siRAD52#2 was used in Fig. 5. (E) DR-GFP assay. siCTRL, siBRCA2, or siRAD51 was used to transfect DR-GFP HeLa cells. Two days after siRNA transfection, pCBASceI (I-sceI endonuclease expression vector) transfection was conducted by electroporation. Five days after pCBASceI transfection, the percentage of EGFP-positive cells was analyzed by flow cytometry (mean  $\pm$  s.d.,  $N=3$ ). (F) The indicated siRNAs were used to co-transfect the HeLa EGFPc>G reporter cells. Two days after siRNA transfection, the total cell lysate was subjected to immunoblotting. The arrow indicates the BRCA2-specific band.
