# Supplementary material for: Precise and efficient nucleotide substitution near genomic nick via noncanonical homology-directed repair
Source: HighWire-hosted journal article supplement (doi:10.1101/gr.226027.117), 2017-12-22
Supplement: Supplemental_Fig_S7.pdf [file Supplemental_Fig_S7.pdf]

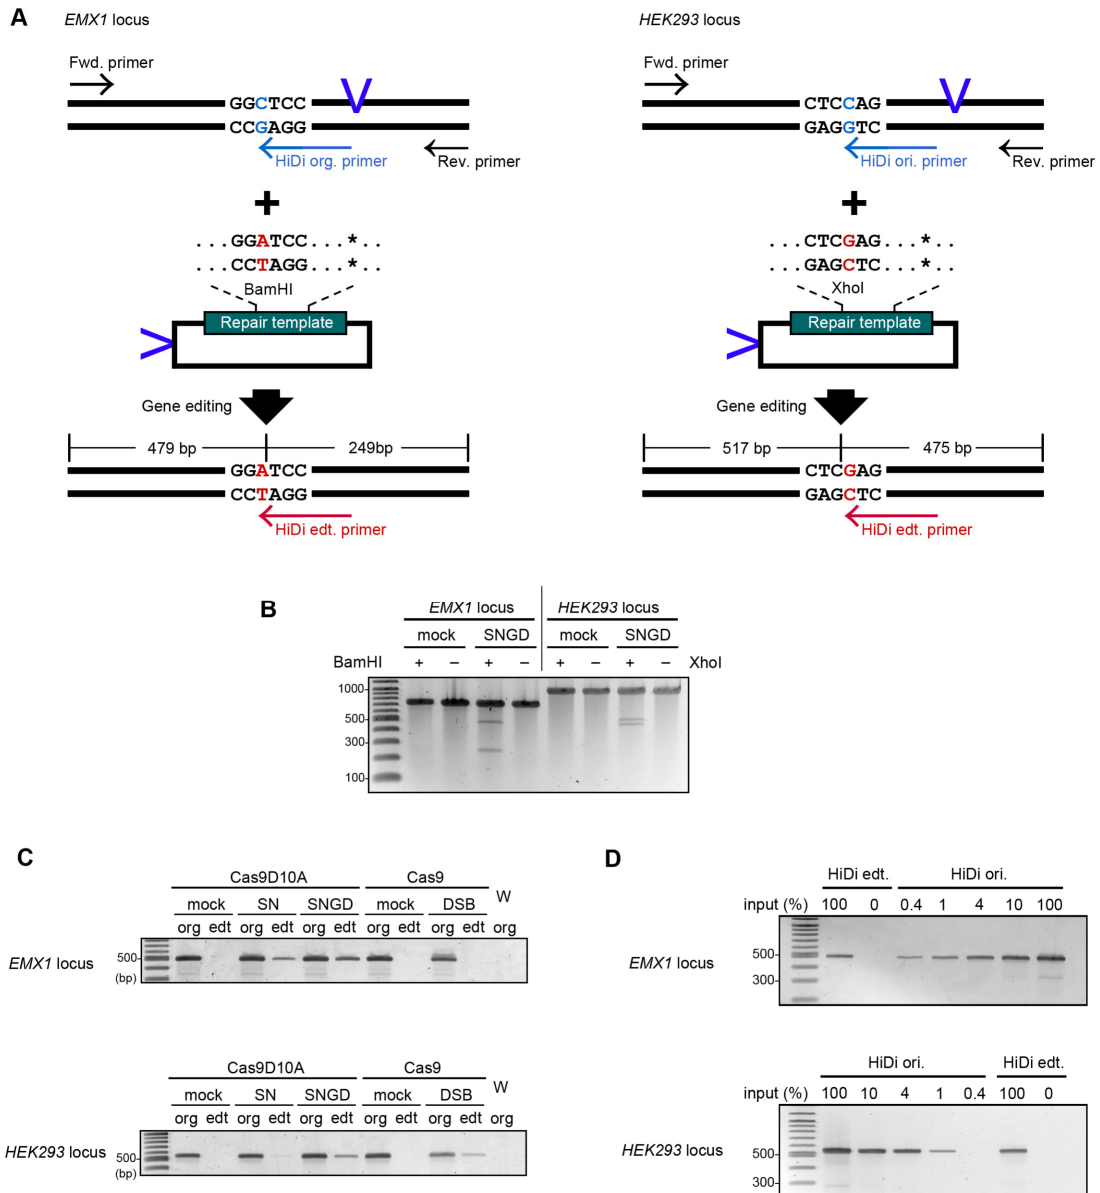

Supplemental Figure S7. SNGD-mediated gene editing at endogenous loci. (A) Schematic of the assay for gene editing at the *EMX1* and *HEK293* loci. The BamHI recognition site was generated at the *EMX1* locus, and the XhoI recognition site was generated at the *HEK293* locus by single nucleotide substitution. Nick sites in the target locus and donor plasmid are indicated by the blue V mark. \*: a mutation in the PAM sequence; HiDi org. primer: the original allele-specific primer for HiDi PCR; HiDi edt. primer: the edited allele-specific primer for HiDi PCR. (B) Genomic DNA, which was extracted from cells after the gene-editing process, was subjected to PCR using the *EMX1* or *HEK293* locus-specific primers. The PCR product was digested with BamHI or XhoI. (C) HiDi PCR for detection of the successfully edited allele. Genomic DNA (10 ng), which was extracted from cells after the gene-editing process, was subjected to HiDi PCR using the fwd. and HiDi org./edt. primers. W: water. (D) Semi-quantitative HiDi PCR. Genomic DNA, which was extracted from cells after the gene-editing process, was subjected to HiDi PCR using the fwd. and HiDi org./edt. primers. Various amounts (100%: 5 ng genomic DNA in a total of 20  $\mu$ L of the PCR mixture) of the extracted genomic DNA were subjected to the assay.
