# Supplementary material for: Precise and efficient nucleotide substitution near genomic nick via noncanonical homology-directed repair
Source: HighWire-hosted journal article supplement (doi:10.1101/gr.226027.117), 2017-12-22
Supplement: Supplemental_Fig_S8.pdf [file Supplemental_Fig_S8.pdf]

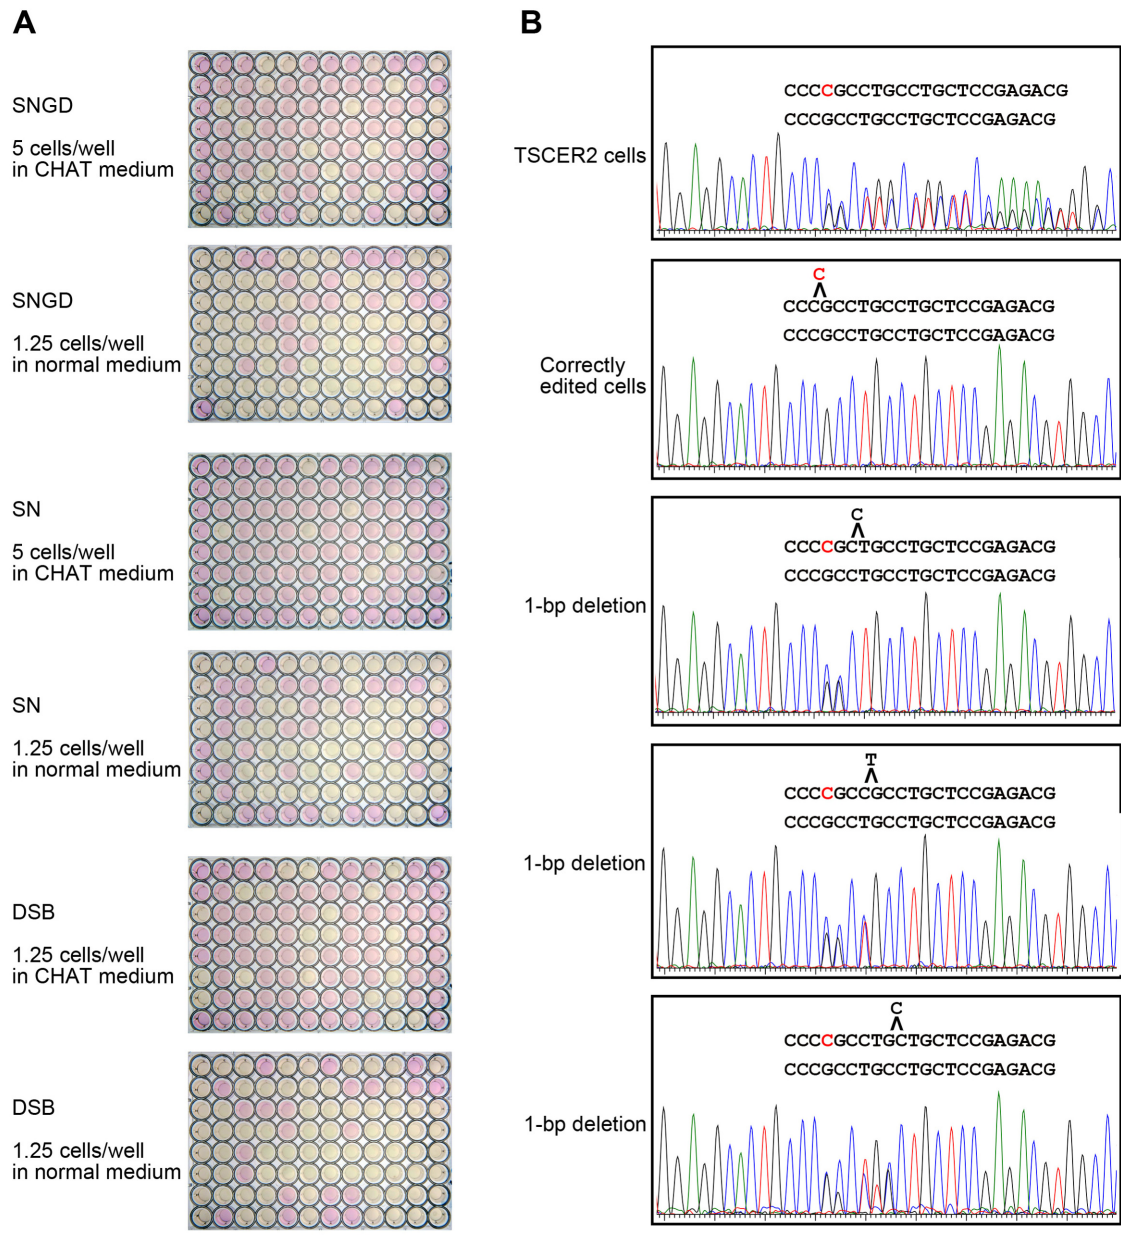

Supplemental Figure S8. SNGD-mediated correction of the *TK1* gene (A) Representative images of cell culture plates are presented. Yellow wells contained proliferating cells. (B) Representative Sanger sequence data are presented.
