# Supplementary material for: Precise and efficient nucleotide substitution near genomic nick via noncanonical homology-directed repair
Source: HighWire-hosted journal article supplement (doi:10.1101/gr.226027.117), 2017-12-22
Supplement: Supplemental_Methods.docx [file Supplemental_Methods.docx]

**Supplemental Methods**

**Cell lines and reporter cell lines**

HeLa and 293T cells were cultured in high-glucose Dulbecco’s modified Eagle’s medium (Nacalai Tesque) supplemented with 10% (v/v) fetal bovine serum (Sigma) at 37**°**C with 5% CO2. TSCER2 cells were cultured in RPMI1640 (Nacalai Tesque) supplemented with 5% (normal culture) or 10% (after electroporation) horse serum (Invitrogen), 0.2 mg/mL sodium pyruvate (Nacalai Tesque), and 100 U/mL penicillin and l00 µg/mL streptomycin (Nacalai Tesque) at 37**°**C with 5% CO2. HeLa cells were obtained from the Japanese Collection of Research Bioresources Cell Bank.DR-GFP HeLa cells were a gift from Drs. Maria Jasin and Junya Kobayashi. The DNA sequence of *mCherry-P2A-EGFP* c.321C>G was cloned into pMX-puro (Cell Biolabs). The DNA sequence of *tagBFP-P2A-EGFP* c.321C>G was cloned into pBABE-hygro (Cell Biolabs) (Supplemental Table S1). Retrovirus was produced using the Retrovirus Packaging Kit Ampho (Takara) following the manufacturer’s protocol. To generate an EGFPcC>G cell line, retrovirus containing the *mCherry-P2A-EGFP* c.321C>Gsequence was used to infect 293T and HeLa cells. The cells were cultured in culture medium with 1 µg/mL puromycin, and a cell sorter (Aria II; BD) was used to isolate mCherry-positive cells to obtain single-cell clones. One clone was chosen for use in this study. Only a single copy of the *mCherry-P2A-EGFP* reporter sequence was detected after gene correction in each reporter cell. To establish bi-EGFPcC>G reporter cells, retrovirus containing the *tagBFP-P2A-EGFP* c.321C>G sequence was used to infect 293T EGFPcC>G reporter cells. The cells were cultured with 200 µg/mL hygromycin B and 1 µg/mL puromycin. Then, single-cell clones were established, as described above. One clone was chosen and used in this study. After gene correction, only a single copy of the *mCherry-P2A-EGFP* reporter sequence and a single copy of the *tagBFP-P2A-EGFP* reporter sequence were detected. The established reporter cell lines were maintained in culture medium with 1 µg/mL puromycin and/or 200 µg/mL hygromycin B.

**Plasmids and oligos**

Cas9-sgRNA co-expression plasmids pSpCas9(BB)-2A-GFP (PX458: Addgene plasmids #48138), pSpCas9(BB)-2A-Puro (PX459: Addgene plasmids #48139 and #62988), pSpCas9n(BB)-2A-GFP (PX461: Addgene plasmids #48140), and pSpCas9n(BB)-2A-Puro (PX462: Addgene plasmids #48141 and #62987) were gifts from Dr. Feng Zhang. The H840A mutant was created by site-directed mutagenesis. Guide sequences were cloned into the sgRNA scaffold of pSpCas9(BB), as described in the Zhang lab.’s protocol with minor modifications. All sgRNAs were designed using the CRISPR Design Tool (http://crispr.mit.edu/). sgRNA scores were analyzed using sgRNA Score 2.0 (https://crispr.med.harvard.edu/sgRNAScorer/). Guide RNA sequences are listed in Supplemental Table S3. Repair templates that were homologous to the *EGFP* sequences (Supplemental Table S4), *EMX1* locus, *HEK293* locus, and the *TK1* gene sequences (Supplemental Table S5) were synthesized and cloned into the pUC57 plasmid (Genscript). pCBASceI was a gift from Dr. Maria Jasin.

**Nucleotide substitution reporter assay**

The transfection of 293T cells with plasmids was performed using Effectene Transfection Reagent (Qiagen) according to the manufacturer’s protocol, with minor modifications. The cells were seeded at a density of 8×104 (293T EGFPcC>G reporter) or 4×104 cells (HeLa EGFPcC>G reporter) cells in a total volume of 700 µL culture medium without puromycin in each well of a 24-well plate. Then, 24 (293T) or 48 (HeLa) hours after seeding, 40 ng of PX459/PX462 into which the guide sequence had been cloned (for example, 40 ng of PX462-sgEGFP332s and 40 ng of PX462-sgUC57N2), and 400 ng of donor plasmids were used to transfect the cells. In the experiments shown in Supplemental Fig. S4C-E, G, H, J, K, 120 ng of PX462-sgEGFP and 40 ng of PX462-sgUC57 were used. In the experiments shown in Supplemental Fig. S4I, 40 or 80 ng of PX459-sgEGFP was used. Two days after transfection, the cells were seeded in culture medium with 1 µg/mL puromycin (293T only). The Neon Transfection System (Invitrogen) was used for electroporation to transfect HeLa cells with the plasmids. In total, 1×105 HeLa cells with two types of PX462 plasmids (0.15 µg each) and donor plasmids (1.5 µg) in 10 µL R buffer were subjected to electroporation (Pulse voltage: 1,005 V, Pulse width: 35 ms, Pulse number: 2). In the experiment shown in Supplemental Fig. S4A, two types of PX462/PX459 plasmids (0, 0.05, 0.1, 0.15, or 0.2 µg each) and donor plasmids (0, 0.5, 1.0, 1.5, or 2.0 µg) in 10 µL R buffer were subjected to electroporation. The cells were cultured in 500 µL culture medium in a 48-well plate scale. Four (293T) or five days (HeLa) after transfection, the cells were trypsinized and then subjected to FACS Calibur (BD) flow cytometry.

**Nucleotide substitution reporter assay and DR-GFP reporter assay after gene knockdown**

In total, 4 µL of 20 µM siRNA was used to transfect EGFPcC>G HeLa reporter cells or DR-GFP HeLa reporter cells (Pierce et al., 1999) with 4 µL of Lipofectamine RNAiMAX (Invitrogen) in a 6-well plate scale. For BRCA2 and RAD52 double-knockdown, 4 µL of 20 µM siBRCA2 and 8 µL of 20 µM siRAD52 were used to transfect EGFPcC>G HeLa reporter cells with 8 µL of Lipofectamine RNAiMAX (Invitrogen) in a 6 cm dish scale. Two days after transfection, two types of Cas9-sgRNA expression vectors (0.15 µg each) and donor plasmids (1.5 µg) (gene correction assay) or pCBASceI (1 µg) (DR-GFP assay) were electroporated into cells using the Neon Transfection System (Invitrogen). The electroporation program was as follows: pulse voltage: 900 V, pulse width: 35 ms, pulse number: 2. Five days after electroporation, the percentage of EGFP-positive cells was determined by flow cytometry. All siRNA sequences are listed in Supplemental Table S7).

**Immunoblotting**

Cells were lysed in SDS sample buffer and then the lysate was boiled for 5 min. The total cell lysate was separated in acrylamide gel by SDS-PAGE and transferred to a nitrocellulose membrane using the iBlot Gel Transfer System (Invitrogen). The membrane was blocked with 5% skim milk (Nacalai Tesque) in TBST, stained with primary antibodies, washed, and then blotted with horseradish peroxidase (HRP)-conjugated secondary antibodies (Promega). The Western Lightning ECL Pro Reagent Kit or the Western Lightning ECL Ultra Reagent Kit (Perkin Elmer) was used for chemiluminescence. Chemiluminescent signals were detected using a LAS4000 (GE Healthcare).

**Gene editing at *EMX1* and *HEK293* loci**

PX458/PX461 containing the guide sequence (120 ng), PX459/PX462-sgUC57N2 (40 ng), and donor plasmids (400 ng) were used to transfect cells in a 24-well plate. One day after plasmid transfection, the GFP-positive cells were sorted by FACSAria IIu (BD). Genomic DNAs were extracted from the cells after they had been cultured for a week. Genomic DNA (5 ng) was subjected to PCR amplification using KOD plus neo (Toyobo). The PCR mixture was loaded on an agarose gel with TBE buffer. After electrophoresis, the PCR product was cut from the agarose gel and purified. The purified PCR product was treated with BamHI or XhoI at 37**°**C for 3 hours. The reaction mixture was again electrophoresed on an agarose gel in TBE buffer and then visualized by UltraPower DNA safe dye (Gellex International). For HiDi PCR, 10 ng of genomic DNA was subjected to PCR amplification using HiDi DNA polymerase (My POLS). The PCR mixture was electrophoresed on a 1.5% agarose gel in TBE buffer and then visualized using UltraPower DNA safe dye. DNA oligos for PCR are listed in Supplemental Table S6.

**The *TK1* gene correction**

The Neon Transfections System (Invitrogen) was used to transfect TSCER2 cells (5×105 in 10 µL of solution R) with 0.5 µg of PX461-sgTK(ex4), 0.5 µg PX462-sgUC57N2, and 2.0 µg of donor plasmid. The electroporation program was as follows: pulse voltage, 1,350 V; pulse width, 10 ms; pulse number, 3. The transfected cells were incubated in the culture media for 2 days. Then, GFP-positive cells were sorted by FACSAria IIu (BD). After incubation in normal culture medium for 5 days, cells were seeded in a total volume of 200 µL CHAT medium [10 µM 2’-deoxycytidine (Sigma), 200 µM hypoxanthine (Sigma), 100 nM aminopterin (Sigma), and 17.5 µM thymidine (Sigma)] at a density of 1.25, 5, or 20 cells/well in two 96-well plates. To analyze the plating efficiency, the cells were seeded in a total volume of 200 µL normal culture medium at a density of 1.25 cells/well in two 96-well plates. Two weeks after incubation in CHAT medium, colony-positive wells were analyzed. The percentage of CHAT medium-positive cells was calculated using the following equation:

PC: number of colony-positive wells (in CHAT medium), SC: number of seeded cells in a well (in CHAT medium), PN: number of colony-positive wells (in normal medium)

For DNA sequence analysis, cell colonies were directly subjected to PCR using MightyAmp ver.2 (Takara) and the PCR products underwent DNA sequence analyses (Fasmac). Primers for PCR and DNA sequencing are listed in Supplemental Table S6.
