# Supplementary material for: Precise and efficient nucleotide substitution near genomic nick via noncanonical homology-directed repair
Source: HighWire-hosted journal article supplement (doi:10.1101/gr.226027.117), 2017-12-22
Supplement: Supplemental_Table_S1.pdf [file Supplemental_Table_S1.pdf]

## Supplemental Table S1. Sequence of the EGFPc>G reporter

*mCherry-P2A-EGFP c.321C>G*

ATGGTGAGCAAGGGCGAGGAGGATAACATGGCCATCATCAAGGAGTTCATGCGCTTCAAG  
GTGCACATGGAGGGCTCCGTGAACGGCCACGAGTTCGAGATCGAGGGCGAGGGCGAGGGC  
CGCCCTACGAGGGCACCCAGACCGCCAAGCTGAAGGTGACCAAGGGTGGCCCCCTGCC  
TTCGCCTGGGACATCCTGTCCCCCAGTTCATGTACGGCTCCAAGGCCTACGTGAAGCAC  
CCCGCCGACATCCCCGACTACTTGAAGCTGTCTTCCCCGAGGGCTTCAAGTGGGAGCGC  
GTGATGAACTTCGAGGACGGCGGCGTGGTGAACCGTGACCCAGGACTCCTCCCTCCAGGAC  
GGCGAGTTCATCTACAAGGTGAAGCTGCGCGGCACCAACTTCCCTCCGACGGCCCCGTA  
ATGCAGAAGAAGACCATGGGCTGGGAGGCCCTCTCCGAGCGGATGTACCCCGAGGACGGC  
GCCCTGAAGGGCGAGATCAAGCAGAGGCTGAAGCTGAAGGACGGCGCCACTACGACGCT  
GAGGTCAAGACCACCTACAAGGCCAAGAAGCCCGTGACGCTGCCCGGCGCCTACAACGTC  
AACATCAAGTTGGACATCACCTCCACAACGAGGACTACACCATCGTGAACAGTACGAA  
CGCGCCGAGGGCCGCACTCCACCGCGGCATGGACGAGCTGTACAAGGGAAGCGGAGCT  
ACTAACTTCAGCCTGCTGAAGCAGGCTGGAGACGTGGAGGAGAACCCTGGACCTATGGTG  
AGCAAGGGCGAGGAGCTGTTACCGGGGTGGTGCCCATCTGGTTCGAGCTGGACGGCGAC  
GTAAACGGCCACAAGTTTACGCGTGTCCGGCGAGGGCGAGGGCGATGCCACCTACGGCAAG  
CTGACCCTGAAGTTCATCTGCACCACCGGCAAGCTGCCCGTGCCTGGCCACCCTCGTG  
ACCACCCTGACCTACGGCGTGCAGTGTCTCAGCCGCTACCCCGACCATGAAGCAGCAC  
GACTTCTTCAAGTCCGCCATGCCGAAGGCTACGTCCAGGAGCGCACCATCTTCTTCAAG  
GACGACGGCAACTAGAGACCCGCGCCGAGGTGAAGTTCGAGGGCGACACCCCTGGTGAAC  
CGCATCGAGCTGAAGGGCATCGACTTCAAGGAGGACGGCAACATCCTGGGGCACAAGCTG  
GAGTACAACCTACAACAGCCACAACGCTCTATATCATGGCCGACAAGCAGAAGAACGGCATC  
AAGGTGAACTTCAAGATCCGCCACAACATCGAGGACGGCAGCGTGCAGCTCGCCGACCAC  
TACCAGCAGAACACCCCATCGGCGACGGCCCGTGCTGCTGCCCGACAACCACTACCTG  
AGCACCCAGTCCGCCCTGAGCAAAGACCCCAACGAGAAGCGCGATCACATGGTCTGCTG  
GAGTTCGTGACCGCCCGGGATCACTCTCGGCATGGACGAGCTGTACAAGTAA

*tagBFP-P2A-EGFP c.321C>G*

ATGAGCGAGCTGATTAAGGAGAACATGCACATGAAGCTGTACATGGAGGGCACCGTGGAC  
AACCATCACTTCAAGTGCACATCCGAGGGCGAAGGCAAGCCCTACGAGGGCACCCAGACC  
ATGAGAATCAAGGTGGTTCGAGGGCGGCCCTCTCCCTTCGCCTTCGACATCCTGGTACT  
AGCTTCTCTACGGCAGCAAGACCTTCATCAACCACACCCAGGGCATCCCCGACTTCTTC  
AAGCAGTCTTCCCTGAGGGCTTCATGGGAGAGAGTACCACATACGAACACGGGGGC  
GTGCTGACCCTACCCAGGACACCAGCCTCCAGGACGGCTCATCTACAGCCTCAAG  
ATCAGAGGGGTGAAGTTCACATCCAACGGCCCTGTGATGCAGAGAAAACACTCGGCTGG  
GAGGCCTTACCGAGACGCTGTACCCCGCTGACGGCGGCCCTGGAAGGCAGAAACGACATG  
GCCCTGAAGCTCGTGGGCGGGAGCCATCTGATCGCAAACATCAAGACCACATATAGATCC  
AAGAAACCCGCTAAGAACCTCAAGATGCCTGGCGTCTACTATGTGGACTACAGACTGGAA  
AGAATCAAGGAGGCCAACAACGAGACCTACGTGAGCAGCAGAGGTGGCAGTGGCCAGA  
TACTGCGACCTCCCTAGCAAACCTGGGGCACAAGCTTAATGGAAGCGGAGCTACTAACTTC  
AGCCTGCTGAAGCAGGCTGGAGACGTGGAGGAGAACCCTGGACCTATGGTGAGCAAGGGC  
GAGGAGCTGTTACCGGGGTGGTGCCCATCTGGTTCGAGCTGGACGGCGACGTAAACGGC  
CACAACTTTCAGCGTGTCCGGCGAGGGCGAGGGCGATGCCACCTACGGCAAGCTGACCCTG  
AAGTTCATCTGCACCACCGGCAAGCTGCCCGTGCCCTGGCCACCCCTCGTGACCACCTG  
ACCTACGGCGTGCAGTGTCTCAGCCGCTACCCCGACCATGAAGCAGCAGCAGCTTCTTC  
AAGTCCGCCATGCCGAAGGCTACGTCCAGGAGCGCACCATCTTCTTCAAGGACGACGGC  
AACTAGAGACCCGCGCCGAGGTGAAGTTCGAGGGCGACACCCCTGGTGAACCGCATCGAG  
CTGAAGGGCATCGACTTCAAGGAGGACGGCAACATCCTGGGGCACAAGCTGGAGTACAAC  
TACAACAGCCACAACGCTCTATATCATGGCCGACAAGCAGAAGAACGGCATCAAGGTGAAC  
TTCAAGATCCGCCACAACATCGAGGACGGCAGCGTGCAGCTCGCCGACCCTACCGACGAG  
AACACCCCATCGGCGACGGCCCGTGCTGCTGCCCGACAACCACTACCTGAGCACCCAG  
TCCGCCCTGAGCAAAGACCCCAACGAGAAGCGCGATCACATGGTCTGCTGGAGTTCGTG  
ACCGCCCGGGGATCACTCTCGGCATGGACGAGCTGTACAAGTAA

Red letters: The *mCherry* gene. Blue letters: The *tagBFP* gene. Purple letters: The P2A peptide coding sequence.  
Green letters: The *EGFP* gene with c.321C>G mutation (in a black box).
