# Supplementary material for: Precise and efficient nucleotide substitution near genomic nick via noncanonical homology-directed repair
Source: HighWire-hosted journal article supplement (doi:10.1101/gr.226027.117), 2017-12-22
Supplement: Supplemental_Table_S2.pdf [file Supplemental_Table_S2.pdf]

## Supplemental Table S2. Cas9-sgRNA co-expression plasmids

| Plasmid name              | Alternative name | Cas9      | Addgene ID                  |
|---------------------------|------------------|-----------|-----------------------------|
| pSpCas9(BB)-2A-GFP        | PX458            | WT        | #48138                      |
| pSpCas9(BB)-2A-Puro       | PX459            | WT        | #48139, #62988              |
| pSpCas9n(BB)-2A-GFP       | PX461            | Cas9D10A  | #48140                      |
| pSpCas9n(BB)-2A-Puro      | PX462            | Cas9D10A  | #48141, #62987              |
| pSpCas9nH840A(BB)-2A-Puro | -                | Cas9H840A | (site-directed mutagenesis) |

PX458, PX459, PX461, and PX462 were gifts from Dr. Feng Zhang. The H840A mutant was created by site-directed mutagenesis. Target sequences (Supplemental Table S3) were cloned into the sgRNA scaffold of these plasmids as described in the Zhang lab.'s protocol with minor modifications.
