# Supplementary material for: Precise and efficient nucleotide substitution near genomic nick via noncanonical homology-directed repair
Source: HighWire-hosted journal article supplement (doi:10.1101/gr.226027.117), 2017-12-22
Supplement: Supplemental_Table_S3.pdf [file Supplemental_Table_S3.pdf]

### Supplemental Table S3. Target sequences

| <i>EGFP</i> -specific sgRNA        | Target sequence (5'>3')           | Nicking strand (Cas9D10A) |
|------------------------------------|-----------------------------------|---------------------------|
| sgEGFP 41s                         | GCCGTCCAGCTCGACCAGGAT <u>TGG</u>  | sense                     |
| sgEGFP 260s                        | GACGTAGCCTTCGGGCATGG <u>CGG</u>   | sense                     |
| sgEGFP 293s                        | GCCGTTCGTCCTTGAAGAAGAT <u>TGG</u> | sense                     |
| sgEGFP 327s                        | CCTCGAACTTCACCTCGGCG <u>CGG</u>   | sense                     |
| sgEGFP 332s                        | GTCGCCCTCGAACTTCACCT <u>CGG</u>   | sense                     |
| sgEGFP 356s                        | CAGCTCGATGCGGTTACCAG <u>GGG</u>   | sense                     |
| sgEGFP 504s                        | TGCCGTCCTCGATGTTGTGG <u>CGG</u>   | sense                     |
| sgEGFP 612s                        | GGTCTTTGCTCAGGGCGGACT <u>TGG</u>  | sense                     |
| sgEGFP 307as                       | GGAGCGCACCATCTTCTTCA <u>AGG</u>   | antisense                 |
| sgEGFP 314as                       | ACCATCTTCTTCAAGGACGAC <u>CGG</u>  | antisense                 |
| sgEGFP 349as                       | CCGCGCCGAGGTGAAGTTCG <u>AGG</u>   | antisense                 |
| <i>EMX1</i> locus-specific sgRNA   |                                   |                           |
| sgEMX1_15s                         | GCTTCGTGGCAATGCGCCAC <u>CGG</u>   | sense                     |
| <i>HEK293</i> locus-specific sgRNA |                                   |                           |
| sgHEK293_3_25s                     | GCACATACTAGCCCCTGTCT <u>AGG</u>   | –                         |
| <i>TK1</i> exon 4-specific sgRNA   |                                   |                           |
| sgTK (ex4)                         | CGTCTCGGAGCAGGCAGGCG <u>GGG</u>   | sense                     |
| pUC57-specific sgRNA               |                                   |                           |
| sgUC57N1                           | CGTCGTGACTGGGAAAACCCT <u>TGG</u>  | –                         |
| sgUC57N2                           | CAGCTGGCGTAATAGCGAAG <u>AGG</u>   | –                         |
| sgUC57C1                           | CTTCCGGCTCGTATGTTGTG <u>TGG</u>   | –                         |
| sgUC57M1                           | AAGACGATAGTTACCGGATA <u>AGG</u>   | –                         |
| sgUC57M2                           | GCGATAAGTCGTGTCTTACC <u>GGG</u>   | –                         |
| sgUC57A1                           | TCGTAGTTATCTACACGACG <u>GGG</u>   | –                         |
| sgUC57A2                           | TCGCGGTATCATTGCAGCACT <u>TGG</u>  | –                         |

PAM sequences are underlined. All of the sgRNAs were designed using the CRISPR Design Tool (<http://crispr.mit.edu/>).
