# Supplementary material for: Precise and efficient nucleotide substitution near genomic nick via noncanonical homology-directed repair
Source: HighWire-hosted journal article supplement (doi:10.1101/gr.226027.117), 2017-12-22
Supplement: Supplemental_Table_S5.pdf [file Supplemental_Table_S5.pdf]

## Supplemental Table S5. Repair templates (*EMX1*, *HEK293*, and *TK1*)

| PD                              | Repair template                                                                                                                                                                                                                                                                                                                                                                                                                                                                                                                                                                                                                                                                                                                                                                                                                                                                                                                                                                                                                                                                                                                                                                                                                                                                                                                                                                               |
|---------------------------------|-----------------------------------------------------------------------------------------------------------------------------------------------------------------------------------------------------------------------------------------------------------------------------------------------------------------------------------------------------------------------------------------------------------------------------------------------------------------------------------------------------------------------------------------------------------------------------------------------------------------------------------------------------------------------------------------------------------------------------------------------------------------------------------------------------------------------------------------------------------------------------------------------------------------------------------------------------------------------------------------------------------------------------------------------------------------------------------------------------------------------------------------------------------------------------------------------------------------------------------------------------------------------------------------------------------------------------------------------------------------------------------------------|
| EMX1_Bam<br>HI_15pam            | CACCTTGGCTTGGCTTTGCTGGGGCTAGAGGAGCTAGGATGCACAGCAGCTCTGTGACCCTTTGTTTGAGAGGAACAGGAAAACCACCCTTCTCTCTGGCCCACTGTGT<br>CCTCTTCTGCCCCTGCCATCCCCTTCTGTGAATGTTAGACCCATGGGAGCAGCTGGTCAGAGGGGACCCCGGCCTGGGGCCCCTAACCCCTATGTAGCCTCAGTCTTCCC<br>ATCAGGCTCTCAGCTCAGCCTGAGTGTGAGGCCCCAGTGGCTGCTCTGGGGCCTCCTGAGTTTCTCATCTGTGCCCTCCCTCCCTGGCCCAAGGTGAAGGTGTGGTT<br>CCAGAACCAGGAGGACAAAGTACAAACGGCAGAAGCTGGAGGAGGAAGGGCCTGAGTCCGAGCAGAAGAAGAAGGGATCCCATCACATCAATTCGGTGGCGCATTGCCACG<br>AAGCAGGCCAATGGGGAGGACATCGATGTCACCTCCAATGACTAGGGTGGGCAACCACAAACCCACGAGGGCAGAGTGTGCTGCTTGTGCTGGCCAGGCCCTGCGTGGG<br>CCCAAGCTGGACTCTGGCCACTCCCTGGCCAGGCTTTGGGGAGGCCTGGAGTCATGGCCCCACAGGGCTTGAAGCCCGGGCCGCCATTGACAGAGGGACAAGCAATGG<br>GCTGGCTGAGGCCTGGGACCACTTGGCCTTCTCCTCGGAGAGCCTGCCTGCCTGGGCGGGCCCGCCGCCACCAGCAGCCTCCCAGCTGCTCTCCGTGTCTCCAATCTCC<br>CTTTTGTGTTTGTATGCATTTCTGTTTTAATTTATTTTCCAGGCACCACTGTAGTT                                                                                                                                                                                                                                                                                                                                                                                                                                                                                                               |
| HEK293_sit<br>e3_XhoI_25<br>pam | TATAGAATGAGAGTCTCAAACTAATCTTGTAGCTACGCCTGTGATGGGCTAATTGATGAATCAGTGTGGAGAATGGGTACAGTGGCAAATGAGGCTGGAGAGGCC<br>GTGAGCTGCTGTCCCAGAGGGCCTGGGATGTCTGCAGGGAGCTTGGCATGAGAAACCTTGGAGAGTTTTAAGCAAGGGCTGATGTGGGCTGCCTAGAAAGGCATGGAT<br>GAGAGAAGCCTGGAGACAGGGATCCCAGGGAAACGCCATGCAATTAGTCTATTTCTGCTGCAAGTAAGCATGCATTTGTAGGCTTGATGCTTTTTTCTGCTTCTCCA<br>GCCCTGGCCTGGGTCAATCCTTGGGGCCAGACTGAGCACGTGATGGCAGAGGAAAGGAAGCCCTGCTTCCTCGAGAGGGCGTCGAGGACAGCTTTTCATAGACAGGG<br>GCTAGTATGTGCAGCTCCTGCACCGGGATACTGGTTGACAAGTTTGGCTGGGCTGGAAGCCAGCACCTAGGGAGGTCCCTGGAAGGGGCCAGCCTCACCAGGAGAGGAG<br>GGACCTGGCCCTCAGGGTCGAGCTCAACAGAGGAAAAGATCTCAGGGCACCCAGAGCCCAGTGGCTTTGAGCACCTGCATGAAAATCAGAGATCAACCAGATTACCC<br>ATATTGCCCAAGAGAAAAGTGGAGCCAGAAAAGTATGGAGCTTGGCCAGGACCCAGAGGGTGTAGAGGCAGGCCAGAACCAGAGGACAGCTCTGTCCCAGCACTTGC<br>CCTCCTTAATTAGGTGGGTGGTCATATCGCAGTGGTCAGAGACATTGCAAACAATAATAAT                                                                                                                                                                                                                                                                                                                                                                                                                                                                                                                       |
| TK (ex4)                        | GGGCCCTGGTACCTGATGAAGTTGGCCTAGTCTGCCCCAGCTCCTGAACAGTGGAAAGAGTTTTTAGTCTCATTGAGCTTTGTAAGTGGACATTACTAATTTCTAATCCA<br>AAGCATCAAGTGAAGTGGCTTGTATAAATAACTGGTTTTCTCTGGGAGGCTAAGGCGGGTGGATCACTTAAAAGTTAGGAGTCTGAGACCAGCCTGGCCAACATGGTG<br>AAACCCCATGTCTGCTAAAAATACAAAATTAGCTGGGTGTGATGGTGTGTGCCAGTAGTCCCAGCTACTCTTGTGGCTGAGGTGGGAGAATCGCTTGAGACCCTTGAG<br>AATTGGGAGGTAGAGATTGCAGGGAGCCGAGATGGCGCCACTGCACTCCAGCCTGGGTGACAGAGCAAGACTCTGTTTTATAAAAAATAAATAAATAACTGGTTTTCTG<br>GACGAGGGCCTTTCCCATAGGTGCTAACTTCTCAAAGCCCCGGCTGGGTGAACACTGAGCCTGCTTTGCAGGTAGCAGGTGGTCACGACAGTGCCATTCCCTGGCCCTG<br>CATTGTGGCTTCTGGCCTCCCTGGCCCTGCTCACGCTCTGGCTTTCTCTTCCCAGGAACACCATGGAGGCACTGCCCGCCTGCCTGCTCCGAGACGTGGCCCAAGGAGGC<br>CCTGGGCGTGGCTGTCATAGGCATCGACGAGGGGAGTTTTGTAAGTTGGCTTGTCTTGGCATCACTTCTCCTGCCAGCTTCCGCTCTGTCTCCCGTTTTCCCTCGCTG<br>ACTTGGAAAGTTATCTGATCTTTTAGTAAAATAACAAGGTTAAATAGCTACAACACTAGTGTGGAATACCCTCTGAAGGCCCTTTCTAGTTTCCCTGTCATAGTGTGATA<br>GTCTTGTAGGATTCGTTTTACTTTTTTTTTTTTTTTTTTTTTTGGAGACGGAGTTTTGCTCTTGTGGCCAGGCCGAGTACGATGGCACAATCTCACCGCAAACCTTTGCTTCC<br>TGGGTTCAAGCAATTCTCTCCTGTCTCAGCCTCCCGAGTAGCTGGGATTACAGGCATGCGCCACCACGCCAGCTAATTTTATATTTTTTAGTAGAGATGGGGTTTCTCC<br>ATGTTGGTCAAGCTGGTCTCAAACCTCCAACTCAGGTGATCCGCCCCGCCTTGAACCTCCAAAGCGCTGGGATTACAGGCATGAGCTACCACACCTGGCCATTGTACC<br>TTTTTAAAAATACATATATCTATTTACTGGCAAGATGCAGTGACTCACACCTGTAATCTCAGCCTGTGGGAGGCCAAGGTGGACAGATCACTTGA |

Mutations are indicated in red. The EMX1.13 target (the original target site sequence: GGAGCCCTTCTTCTTCTGCT) and the HEK293 site 3 target are underlined. These sequences were cloned into the pUC57 plasmids and used as plasmid donors.
