# Supplementary material for: Precise and efficient nucleotide substitution near genomic nick via noncanonical homology-directed repair
Source: HighWire-hosted journal article supplement (doi:10.1101/gr.226027.117), 2017-12-22
Supplement: Supplemental_Table_S6.pdf [file Supplemental_Table_S6.pdf]

## Supplemental Table S6. Oligo DNA primers

| Target                                                                                                    | Primer name   | Sequence (5'>3')           |                              |
|-----------------------------------------------------------------------------------------------------------|---------------|----------------------------|------------------------------|
| <i>mCherry-P2A-EGFP</i><br>reporter gene                                                                  | forward       | ATCAAGCAGAGGCTGAAGCTGAAG   | (on the <i>mCherry</i> gene) |
|                                                                                                           | reverse       | GGACTTTCCACACCCTAACTGAC    | (on the pMX-puro vector)     |
|                                                                                                           | sequencing    | TGAAGCAGGCTGGAGACGTG       |                              |
| <i>tagBFP-P2A-EGFP</i><br>reporter gene                                                                   | forward       | ATGCCTGGCGTCTACTATGTGGAC   | (on the <i>tagBFP</i> gene)  |
|                                                                                                           | reverse       | TCCACACCCTAACTGACACACATTC  | (on the pBABE-hygro vector)  |
|                                                                                                           | sequencing    | GGGCACAAGCTTAAT            |                              |
| <i>TK1</i> gene exon 4                                                                                    | forward       | TCCTGAACAGTGGAAAGAGTTTTTAG |                              |
|                                                                                                           | reverse       | AACTTACAAACTGCCCTCGTC      |                              |
|                                                                                                           | sequencing    | TGAACACTGAGCCTGCTT         |                              |
| <i>EMX1</i> locus                                                                                         | forward       | GAAGAAGCGATTATGATCTCTCCTCT |                              |
|                                                                                                           | reverse       | ATTGCTTGTCCCTCTGTCAATG     |                              |
|                                                                                                           | HiDi original | CCACCGGTTGATGTGATGGGAG     |                              |
|                                                                                                           | HiDi edited   | CCACCGGTTGATGTGATGGGAT     |                              |
| <i>HEK293</i> locus<br>(ref. AL359552.16<br>Human DNA sequence from clone<br>RP11-363D24 on chromosome 9) | forward       | GAGGCCAGTTGCAAAGACAA       |                              |
|                                                                                                           | reverse       | ATACAAGGTGCTTAGCATAGTGCC   |                              |
|                                                                                                           | HiDi original | AGCTGTCCTGCGACGCCCTCTG     |                              |
|                                                                                                           | HiDi edited   | AGCTGTCCTGCGACGCCCTCTC     |                              |
