# Supplementary material for: Precise and efficient nucleotide substitution near genomic nick via noncanonical homology-directed repair
Source: HighWire-hosted journal article supplement (doi:10.1101/gr.226027.117), 2017-12-22
Supplement: Supplemental_Table_S7.pdf [file Supplemental_Table_S7.pdf]

### Supplemental Table S7. The list of siRNAs

| siRNA   | Product name or sequence (5'>3')                     |
|---------|------------------------------------------------------|
| siCTRL  | MISSION siRNA Universal Negative Control 1 (SIC-001) |
| siBRCA2 | UAAGGAACGUCAAGAGAUAdTdT                              |
| siRAD51 | GUGCUGCAGCCUAAUGAGAdTdT                              |
| siRAD52 | ACACAUUAGCCUUGAACAAAdTdT                             |
| siCtIP  | GCUAAAACAGGAACGAAUCdTdT                              |
