# Supplementary material for: Precise and efficient nucleotide substitution near genomic nick via noncanonical homology-directed repair
Source: HighWire-hosted journal article supplement (doi:10.1101/gr.226027.117), 2017-12-22
Supplement: Supplemental_Text.docx [file Supplemental_Text.docx]

**Supplemental Text**

**A nick in the antisense strand of the EGFPcC>G reporter gene did not promote SNGD-mediated gene editing as efficiently as a nick in the sense strand.**

We considered whether a nick not only at the sgEGFP332s site but also at other sites in the EGFPcC>G reporter can induce SNGD-mediated gene editing. To investigate this, we designed three new sgEGFPs (sgEGFP293s, sgEGFP327s and sg356s) that induce nicks in the sense strand of the EGFPcC>G reporter gene with Cas9D10A (Supplemental Fig. S4B). We constructed PX462 plasmids that co-expressed Cas9D10A and one of these sgEGFPs, and donor plasmids that contained a silent mutation on the PAM of each sgEGFP target region (m293pamPD, m327pamPD and m356pamPD). SNGD using one of these sgEGFPs and pUC57-specific sgRNA showed more efficient nucleotide substitution than an SN using identical sgEGFPs (Supplemental Fig. S4C–E). However, the efficiency of gene editing by these three sgEGFPs was lower than that of sgEGFP332s, suggesting that efficiency of SNGD differs from site to site. This can also be attributed to the variations in the efficiency of sgRNAs in promoting Cas9 to cleave the target site. Indeed, sgEGFP332s showed the highest sgRNA score (Chari et al. 2015) among these sgEGFPs.

SNGD also showed more efficient gene editing than SN when we used Cas9H840A, which adds a nick to the non-target strand of DNAs (Supplemental Fig. S4F). However, a nick in the EGFPcC>G reporter by Cas9H840A was less efficient than that by Cas9D10A for promoting SNGD-mediated gene editing (Supplemental Fig. S4F). This suggests that a nick in the antisense strand may not efficiently induce SNGD-mediated gene editing. However, we could not exclude the possibility that Cas9H840A less efficiently nicks DNA than Cas9D10A. To investigate whether nicking the antisense strand by Cas9D10A induces efficient SNGD-mediated gene editing, we designed three sgEGFPs (sgEGFP307as, sgEGFP314as, and sgEGFP349as; Supplemental Fig. S4B) to introduce a nick in the antisense strand of the EGFPcG>G reporter gene with Cas9D10A. The sgEGFP349as target region shares 23 of 23 bp in the sgEGFP327s target region (Supplemental Fig. S4B). The sgEGFP314as target region shares 22 of 23 bp in the sgEGFP293s target region (Supplemental Fig. S4B). sgEGFP314as and sgEGFP349as showed less efficient SNGD-meditated gene editing than sgEGFP293s and sgEGFP327s (Supplemental Fig. S4C, D, G, H). sgEGFP307as introduces a nick 3 bp downstream of the sgEGFP293s-induced nick with Cas9D10A (Supplemental Fig. S4B). sgEGFP307as promoted DSB-mediated gene editing as efficiently as sgEGFP332s with wild-type Cas9 (Supplemental Fig. S4I), suggesting that sgEGFP307as can efficiently introduce a nick with Cas9D10A. However, sgEGFP307as showed less efficient SNGD-mediated gene editing than sgEGFP293s (Supplemental Fig. S4C, J, K).

**References**

Chari R, Mali P, Moosburner M, Church GM. 2015. Unraveling CRISPR-Cas9 genome engineering parameters via a library-on-library approach. *Nat Methods* **12**: 823-826.
